# Supplementary material for: Last Glacial Maximum Climate and Atmospheric Circulation over the Australian Region from Climate Models
Source: Copernicus journal article supplement (doi:10.5194/cp-2023-19), 2023-04-05
Supplement: Supplementary file 1 [file cp-2023-19-supplement.pdf]

*Supplement of*

# **Last Glacial Maximum Climate and Atmospheric Circulation over the Australian Region from Climate Models**

**Yanxuan DU, Josephine R. Brown, J.M. Kale Sniderman**

5 *Correspondence to:* Yanxuan DU (yanxuand@student.unimelb.edu.au)

10

15

20

25 **Table S1:** JJA LGM - PI anomalies for the strengths of the 850 hPa westerlies over 30°S to 35°S Southern Australia domain and precipitation averages over smaller south-west Australia domain (30°S-35°S, 115°E-120°E) simulated by each CMIP5 and CMIP6 models (excluding CMIP6 INM-CM4-8 model).

| <b>Model name</b> | <b>JJA strengths of westerlies<br/>(m/s)</b> | <b>JJA average precipitation<br/>(mm/day)</b> |
|-------------------|----------------------------------------------|-----------------------------------------------|
| AWI-ESM-1-1-LR    | -0.36                                        | -0.78                                         |
| CCSM4             | 0.86                                         | 0.19                                          |
| CNRM-CM5          | -0.34                                        | -0.08                                         |
| FGOALS-g2         | -1.10                                        | -1.30                                         |
| GISS-E2-R         | 0.45                                         | 0.21                                          |
| IPSL-CM5A-LR      | 0.37                                         | 0.30                                          |
| MIROC-ES2L        | -0.14                                        | -0.55                                         |
| MIROC-ESM         | 0.03                                         | 0.05                                          |
| MPI-ESM-P         | -0.62                                        | 0.24                                          |
| MPI-ESM1-2-LR     | 0.79                                         | 0.39                                          |
| MRI-CGCM3         | -1.15                                        | 0.16                                          |

30

35

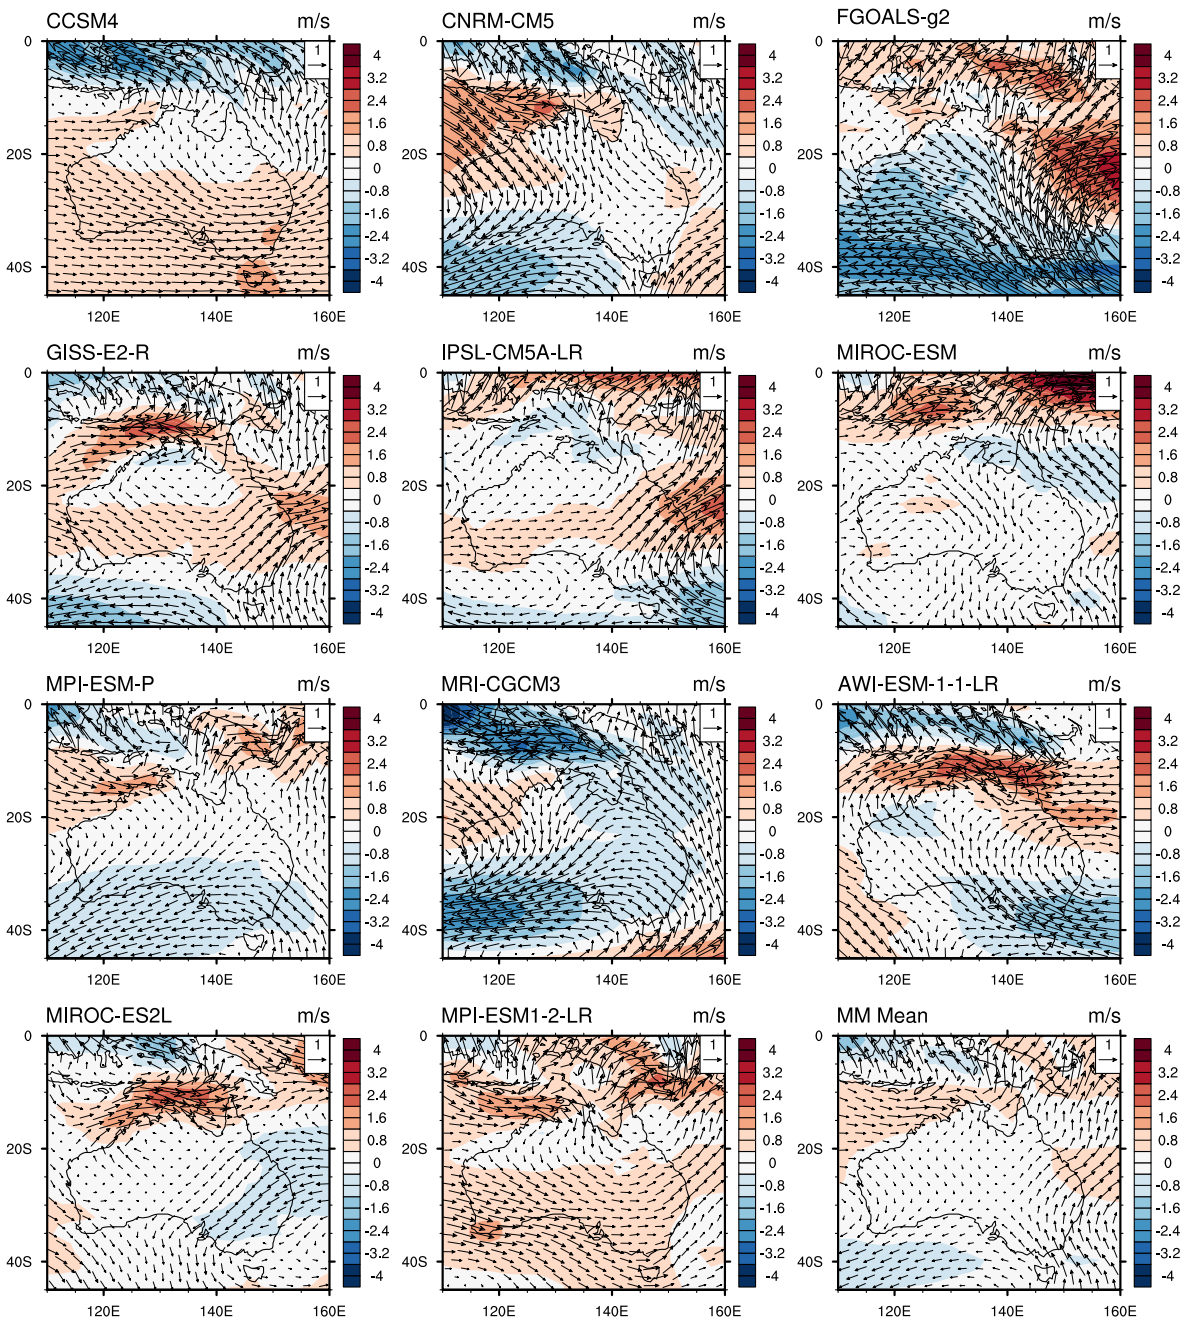

**Figure S1:** JJA LGM - PI 850 hPa wind and change in zonal (westerly) wind (m/s) simulated by individual CMIP5 and CMIP6 models (except INM model which provided only near-surface winds) and MM mean over the Australian domains.

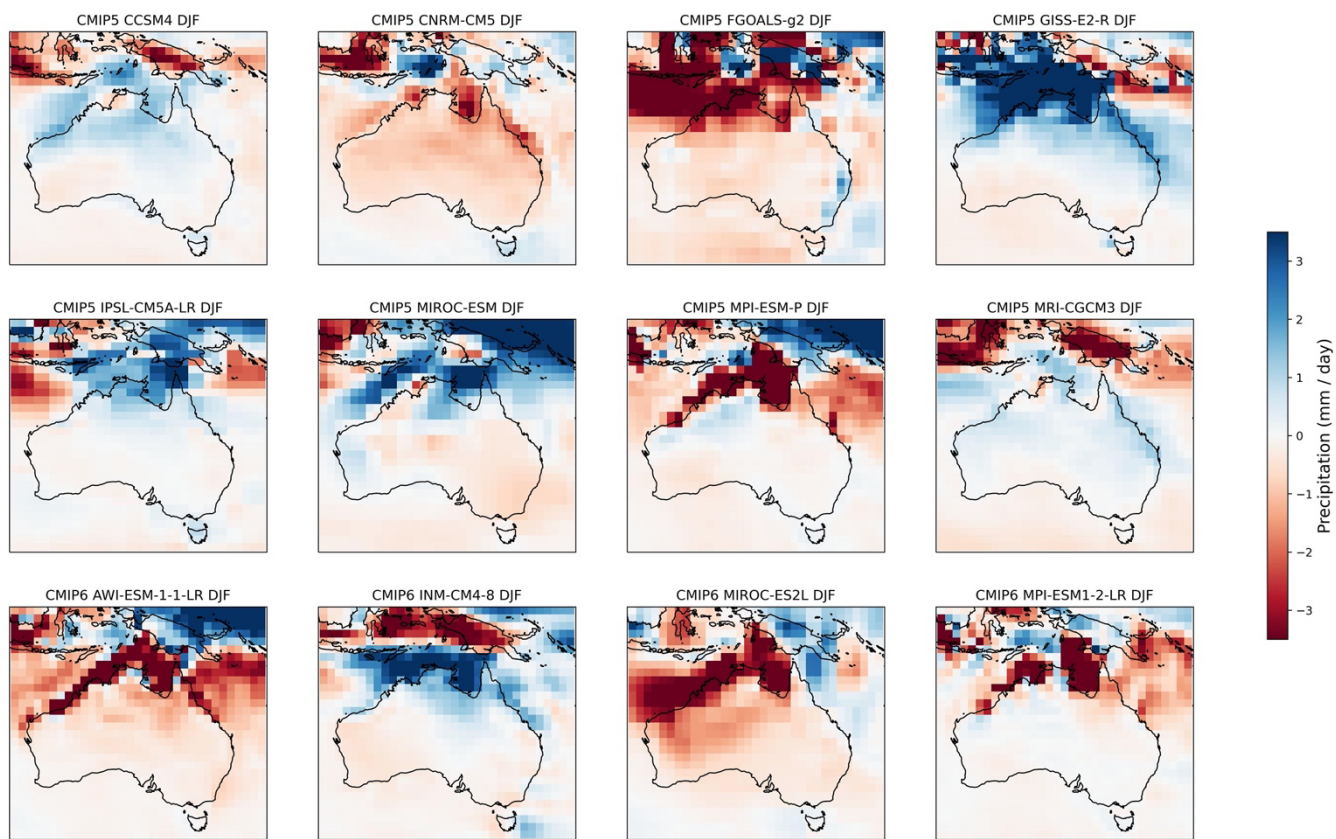

**Figure S2:** DJF LGM - PI mean precipitation anomaly (mm/day) over the Australian domain simulated by individual CMIP5 and CMIP6 models.

45

50

55

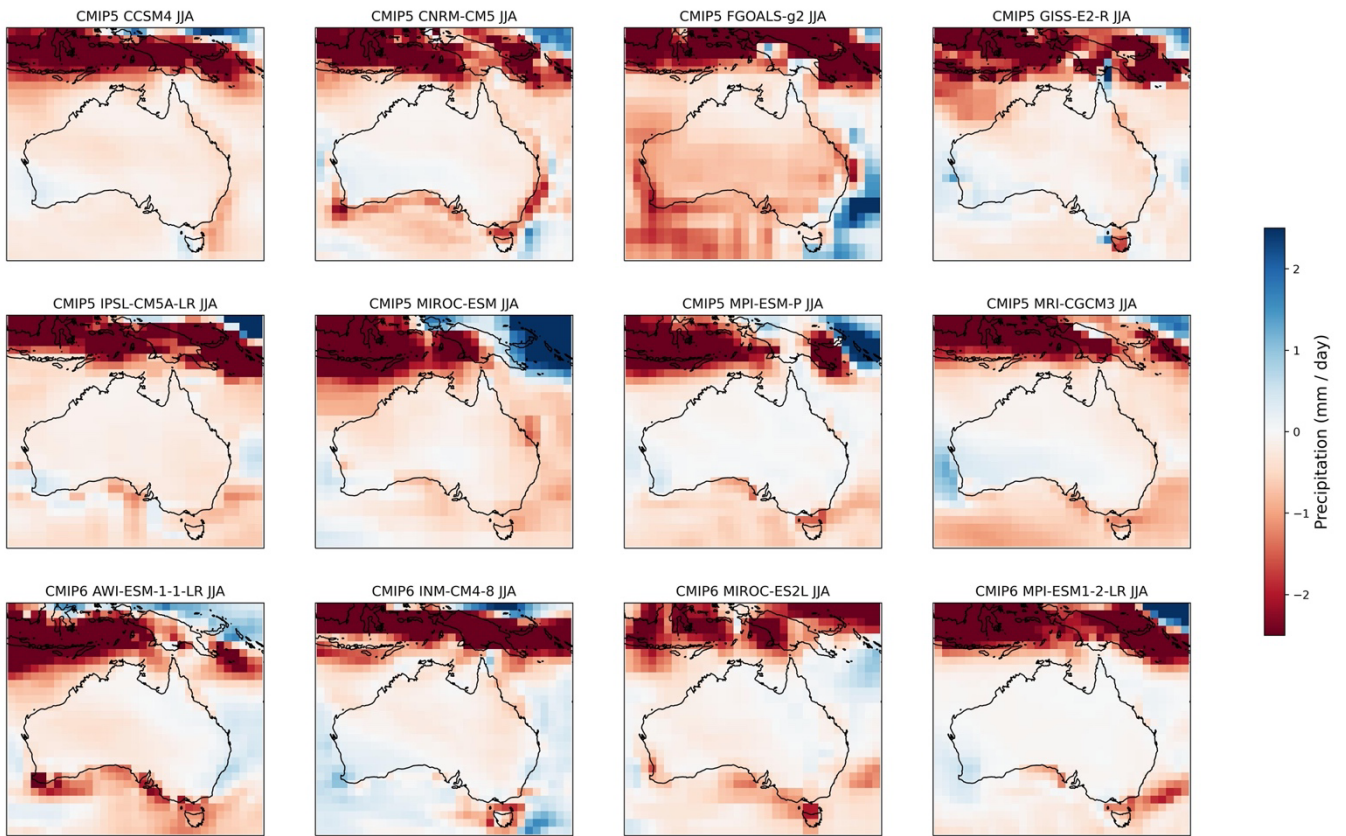

**Figure S3:** JJA LGM - PI mean precipitation anomaly (mm/day) over Australia simulated by individual CMIP5 and CMIP6 models.

60

65

70

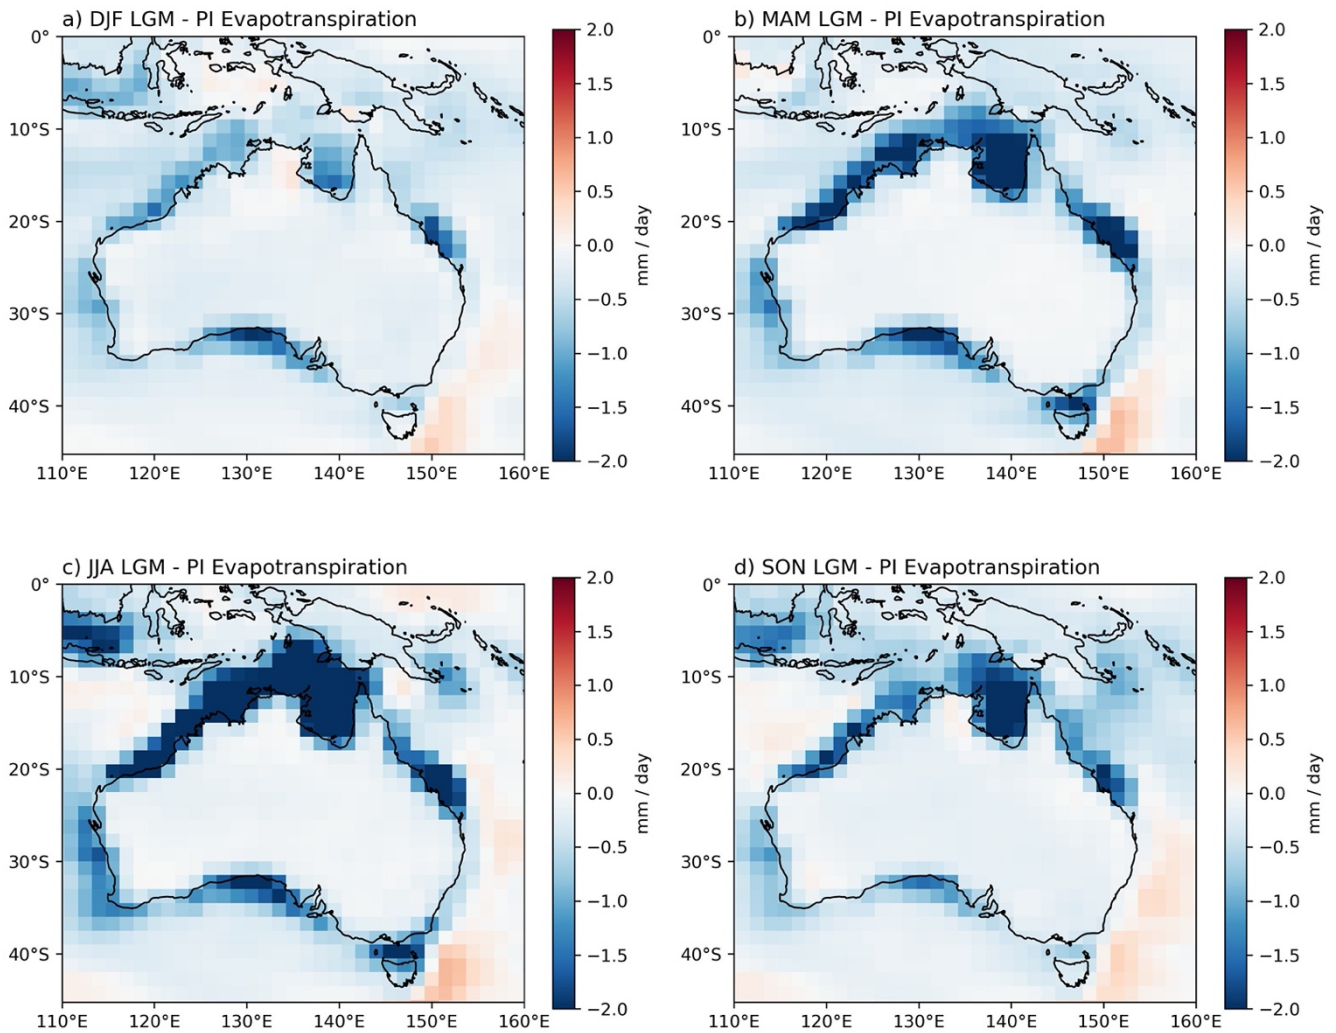

75 **Figure S4:** MMM seasonal anomalies for LGM - PI evapotranspiration (E, mm/day) simulated by the ensemble of CMIP5 and CMIP6 models for (a) DJF, (b) MAM, (c) JJA and (d) SON seasons.

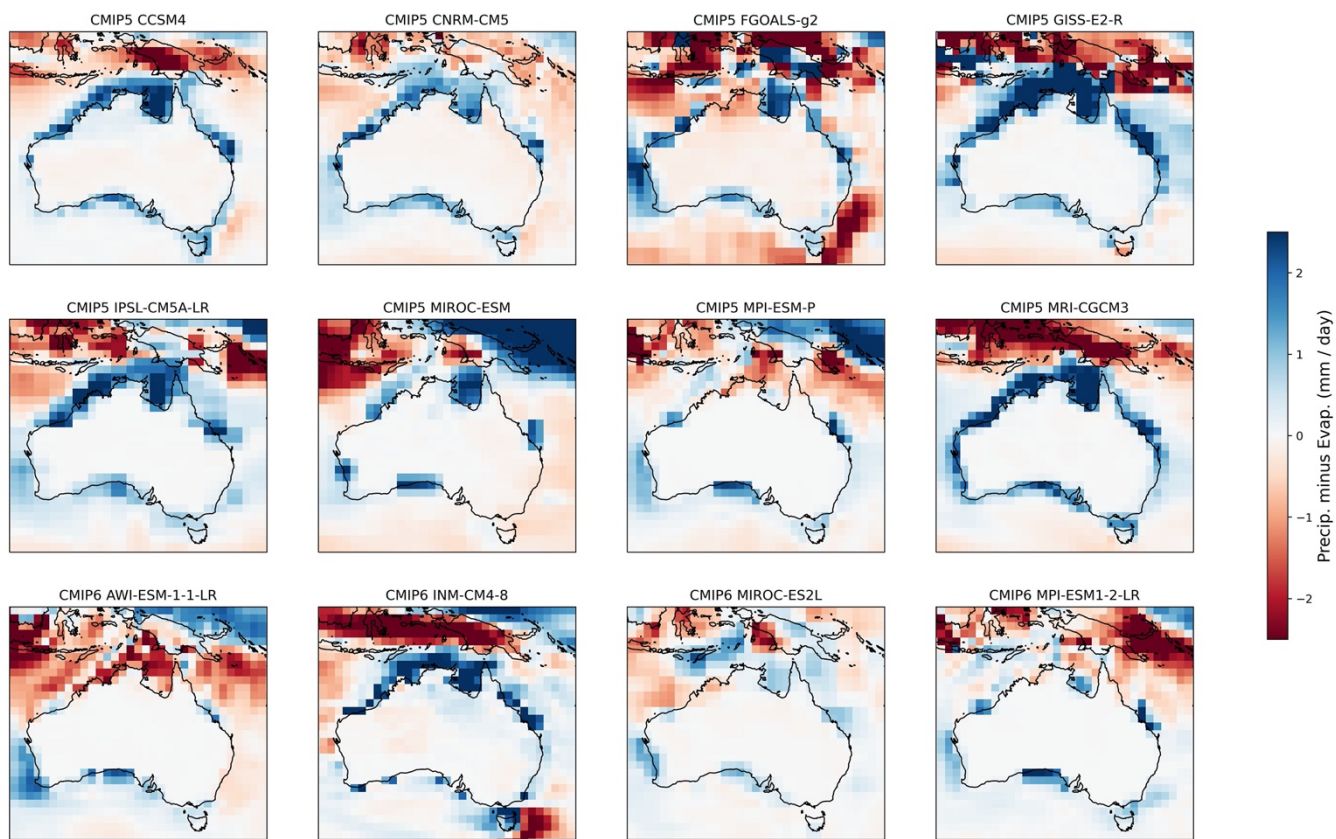

85

**Figure S5:** Annual LGM - PI mean precipitation – evapotranspiration anomaly (P-E, mm/day) simulated by individual CMIP5 and CMIP6 models over the Australian domains.

90

95

100

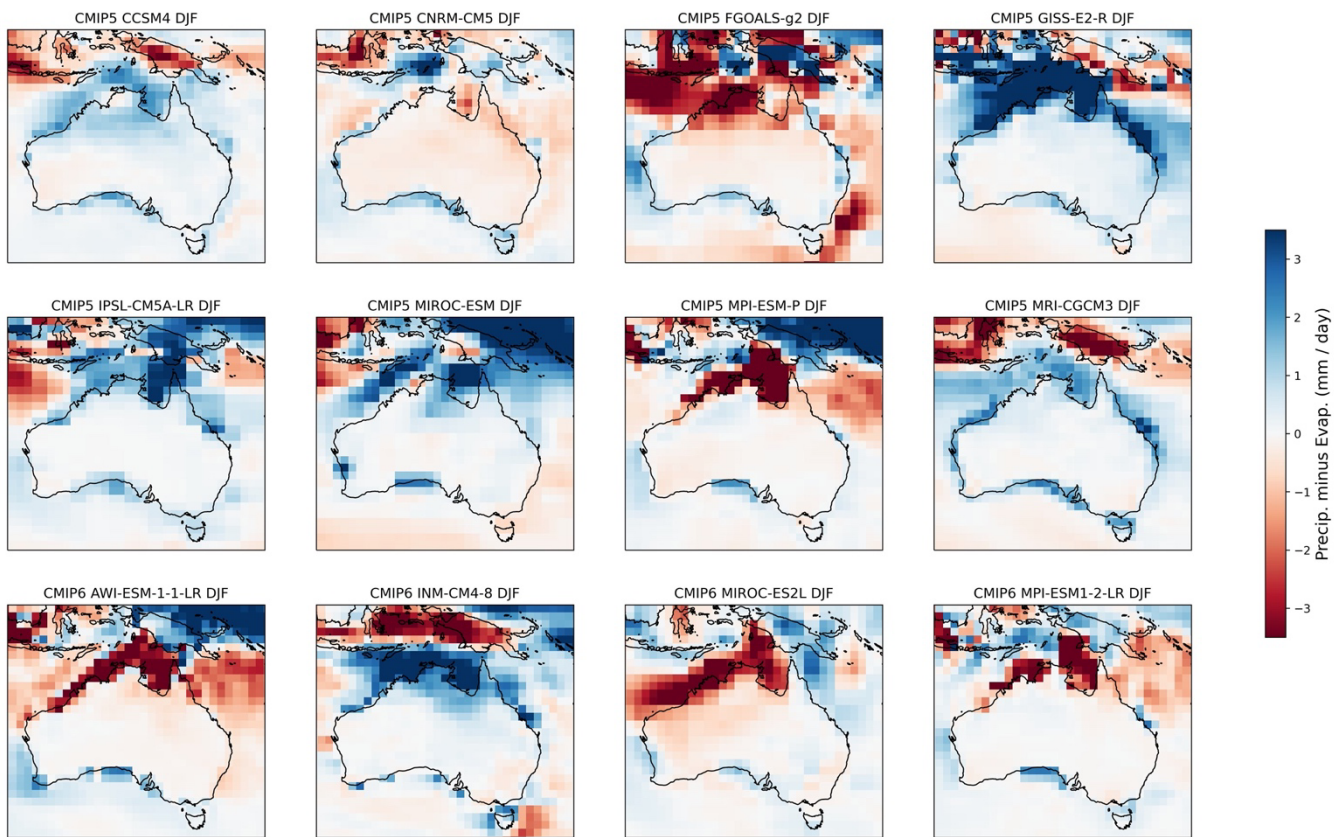

**Figure S6:** DJF LGM - PI mean precipitation - evapotranspiration anomaly (P-E, mm/day) over Australia simulated by individual CMIP5 and CMIP6 models.

105

110

115



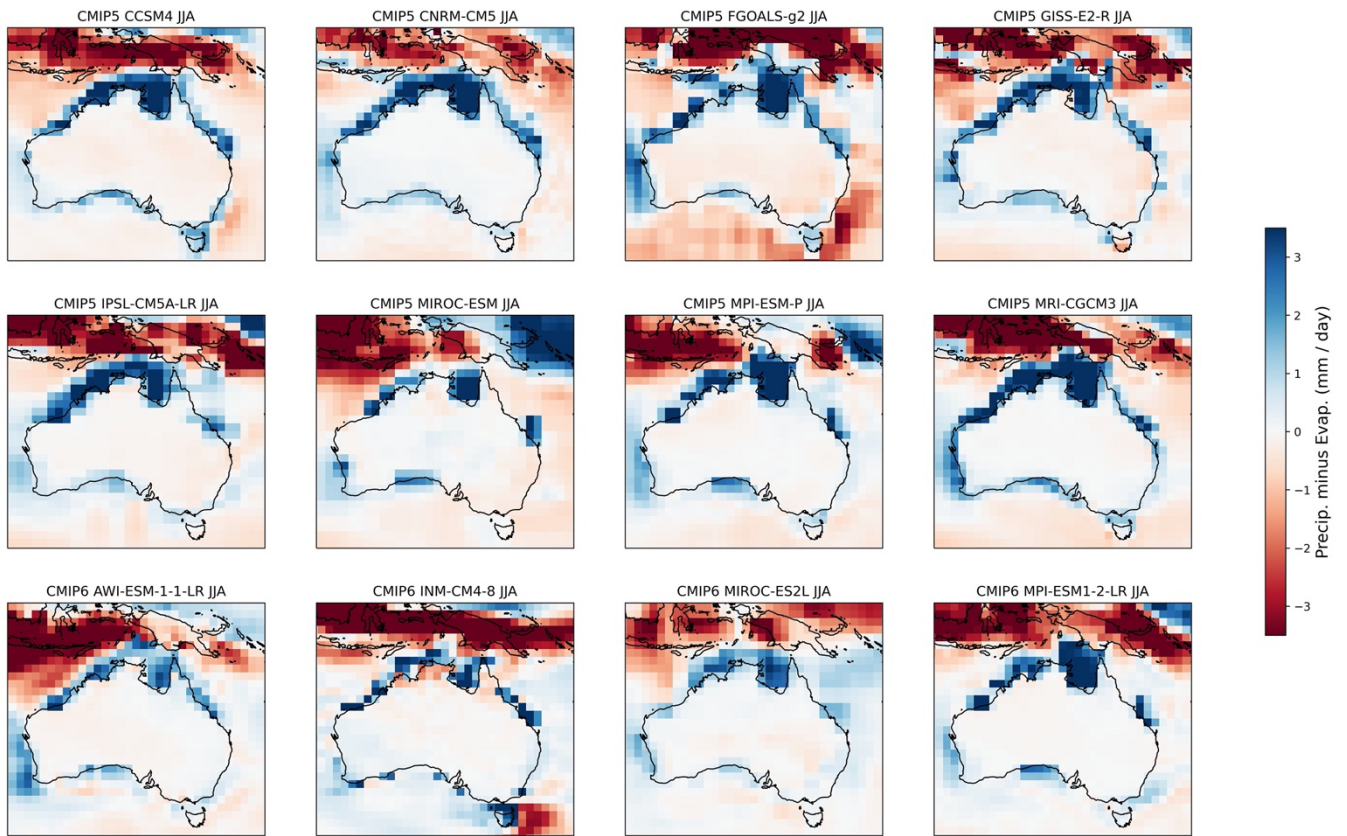

**Figure S7:** JJA LGM - PI mean precipitation - evapotranspiration anomaly (P-E, mm/day) over Australia simulated by individual CMIP5 and CMIP6 models.

120

125

130

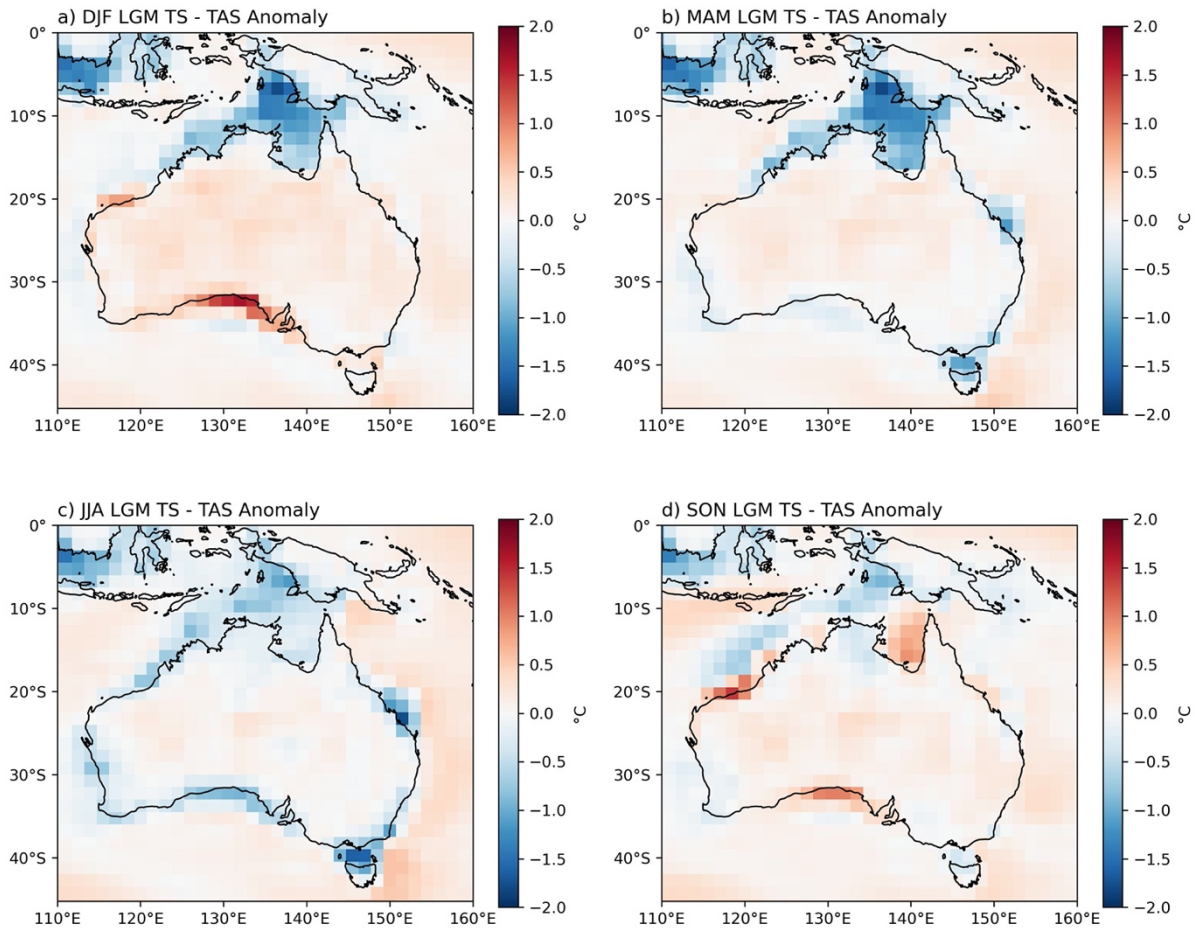

135 **Figure S8:** MMM seasonal anomalies for LGM - PI surface temperatures (TS) - surface air temperature (TAS) simulated by the ensemble of CMIP5 and CMIP6 models for (a) DJF, (b) MAM, (c) JJA and (d) SON seasons. Units are °C.
